# Supplementary material
Source: Research Square preprint supplement (doi:10.21203/rs.3.rs-9577206/v1)
Supplement: Supplementary file 1 [file 332ce625e83f81f4f531f517.docx]

## Additional file 1

**Information given to participants before entering the scenario**

You are working on the night Medic 50 response car and are tasked early in the shift to the skate park in Chelmsford for a patient given as unconscious and not breathing. You arrive simultaneously with the land ambulance crew and are met by a bystander.

**Simulation fidelity detail**

The large room within the simulation suite is where the incident has taken place, and the smaller room will simulate the rear of a land ambulance. The simulated patient will at times be a manikin to facilitate invasive procedures and at other times a live role player to facilitate the capture of observational data. The live role player has a prosthetic right arm that can be cannulated, and they will be wearing a ‘skin suit.’ The role player’s clothes can be cut away to the level of the ‘skin suit’. The manikin can be intubated and cannulated.

*When you undertake the process of drawing ‘blood’ from the prosthetic or manikin arm, a tube of control agent (mimicking the patient’s blood) will be given to you for testing.

All assessments and interventions should be completed in ‘real-time’ and should take as long to complete as they would in a real scenario. The iSimulate will be used for monitoring. Any drugs should be prepared in the normal way using the simulated solutions, syringes etc provided in the training kit bags. The patient’s observations will be as you find them on the iSimulate. Articulating decisions, thought processes is encouraged but not essential.

**Use of all novel neuromonitoring devices should be attempted and these can be deployed in any order as you see appropriate in the care of the simulated patient. The data acquired from the devices should be added to the results template provided.

* simulations 1-8

**simulations 1-16
